# Supplementary material for: Non-surgical and surgical treatments for rotator cuff disease: a pragmatic randomised clinical trial with 2-year follow-up after initial rehabilitation
Source: HighWire-hosted journal article supplement (doi:10.1136/annrheumdis-2020-219099), 2020-12-03

Figure S3. Graphs showing the per protocol (PP) analysis of change in pain in the visual analogue scale (VAS) and the Constant Murley score (CMS) between baseline and the 2-year follow-up in all patients with rotator cuff disease and without and with full-thickness rotator cuff rupture.

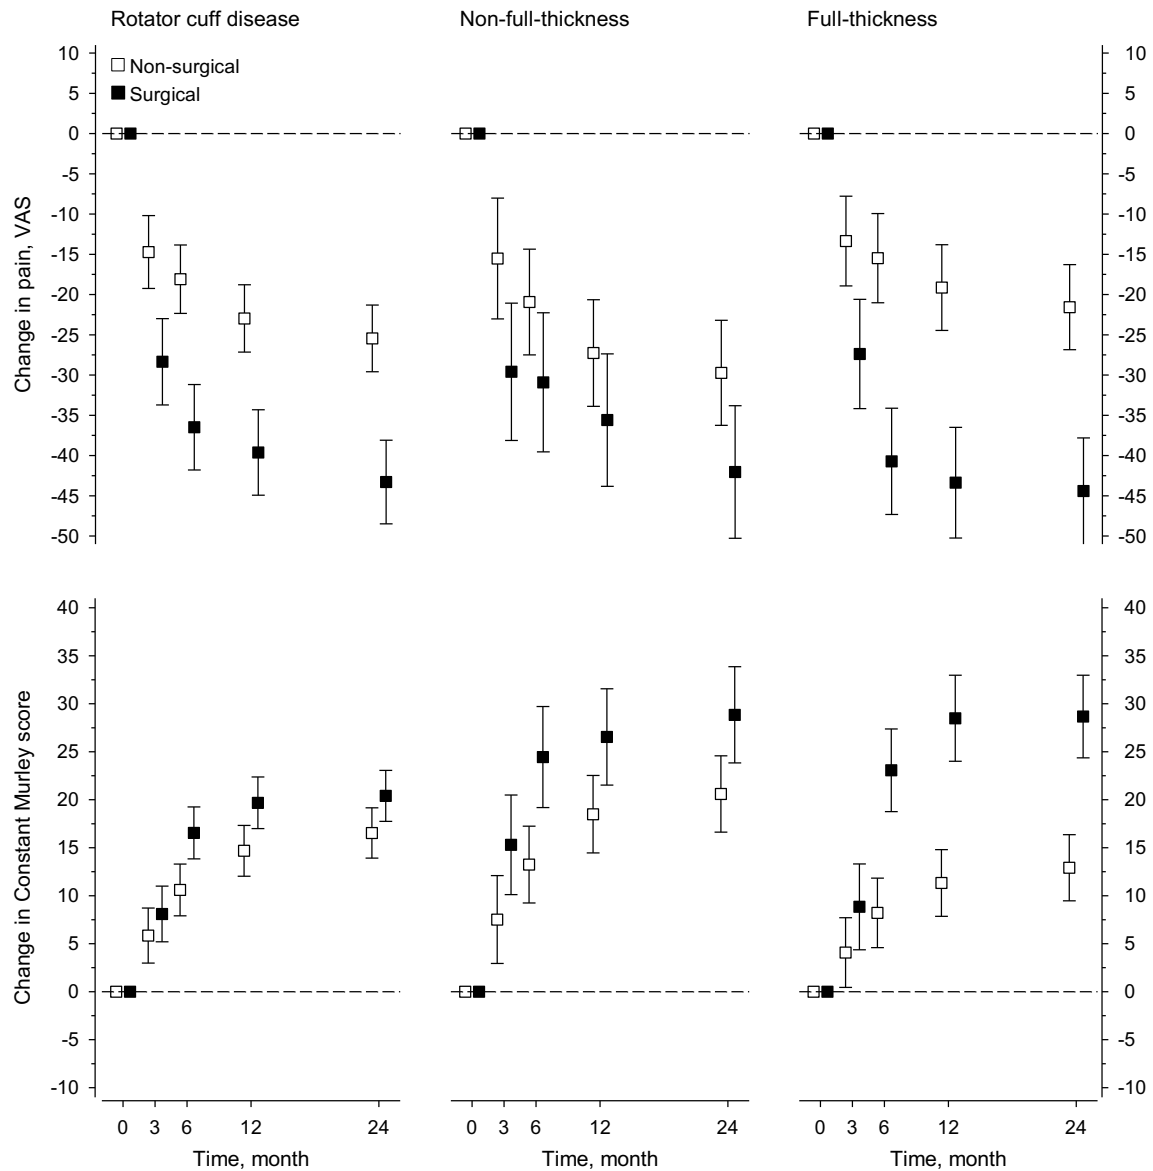

Supplement: annrheumdis-2020-219099supp003_data_supplement.pdf [file annrheumdis-2020-219099supp003_data_supplement.pdf]
